# Supplementary material
Source: PubMed Central journal article supplement (PMC2712268)

A

- GP-STN terminals
- Simulated terminals

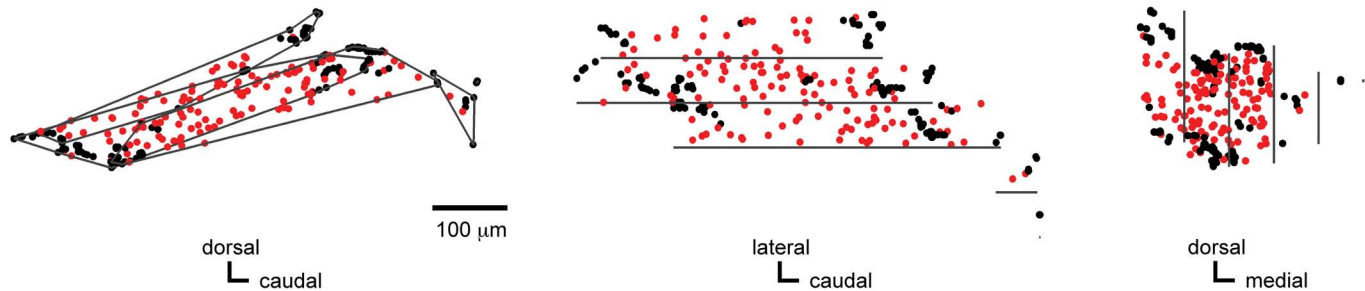

B1

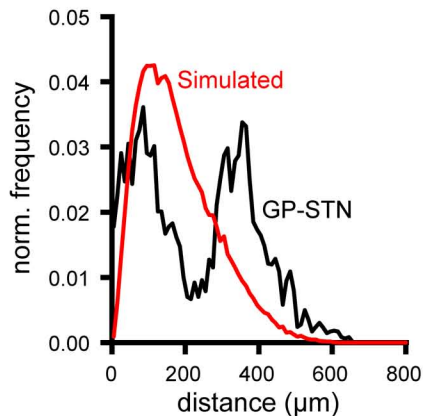

B2

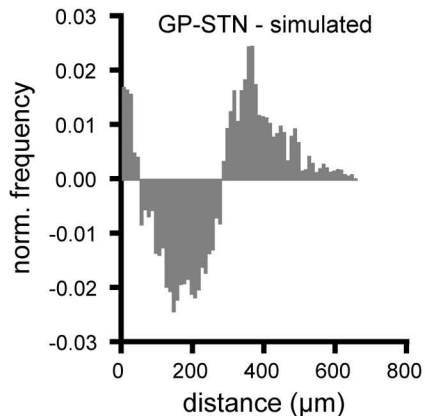

C

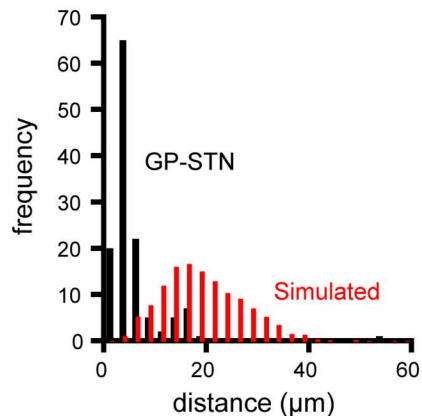

Supplement: 00305.2009_1.pdf [file 00305.2009_1.pdf]

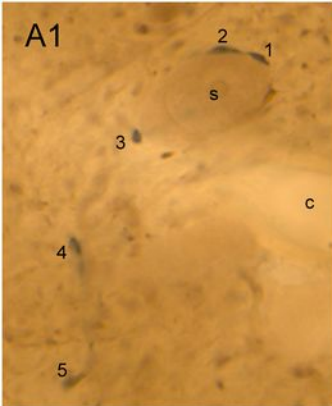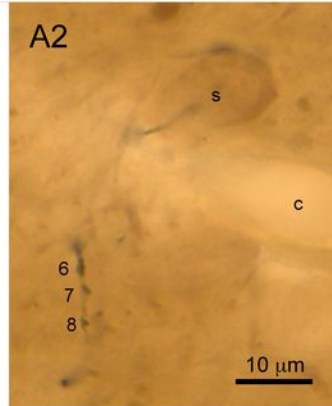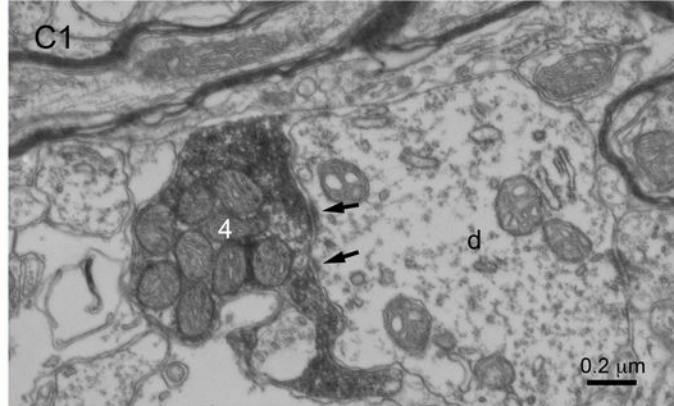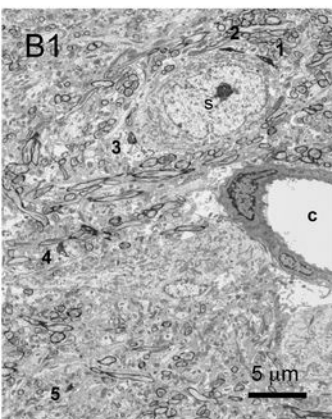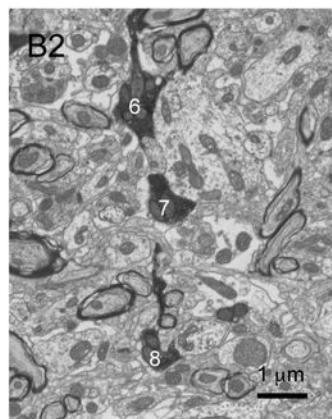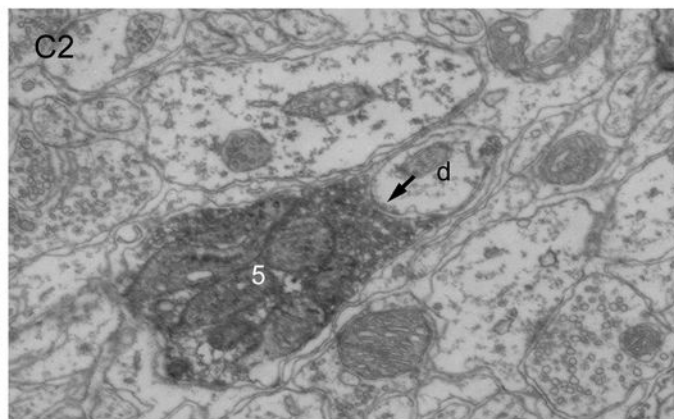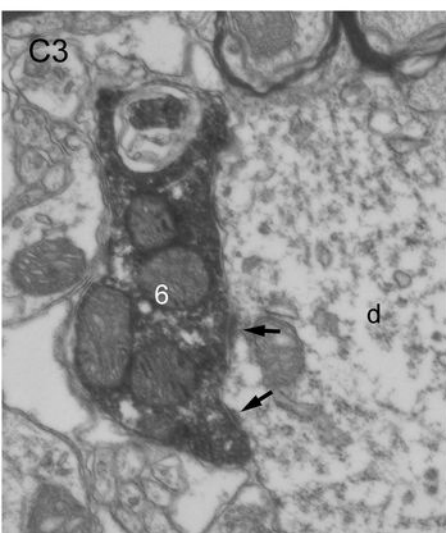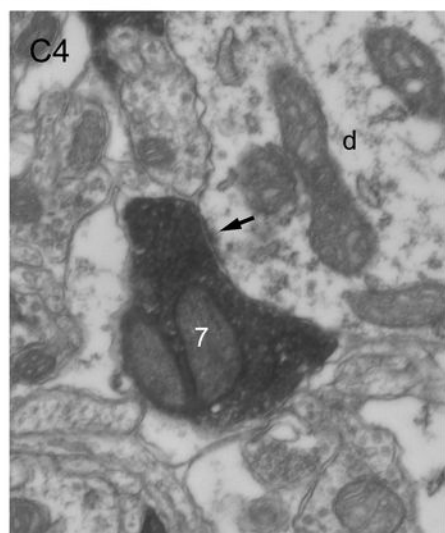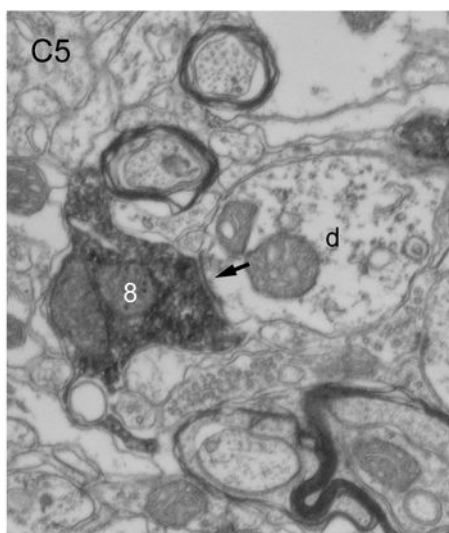

Supplement: 00305.2009_2.pdf [file 00305.2009_2.pdf]

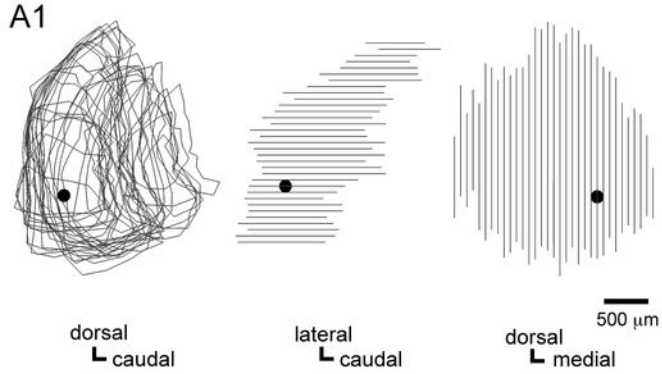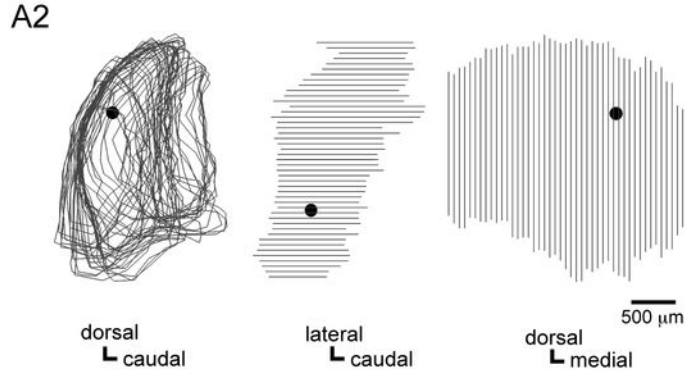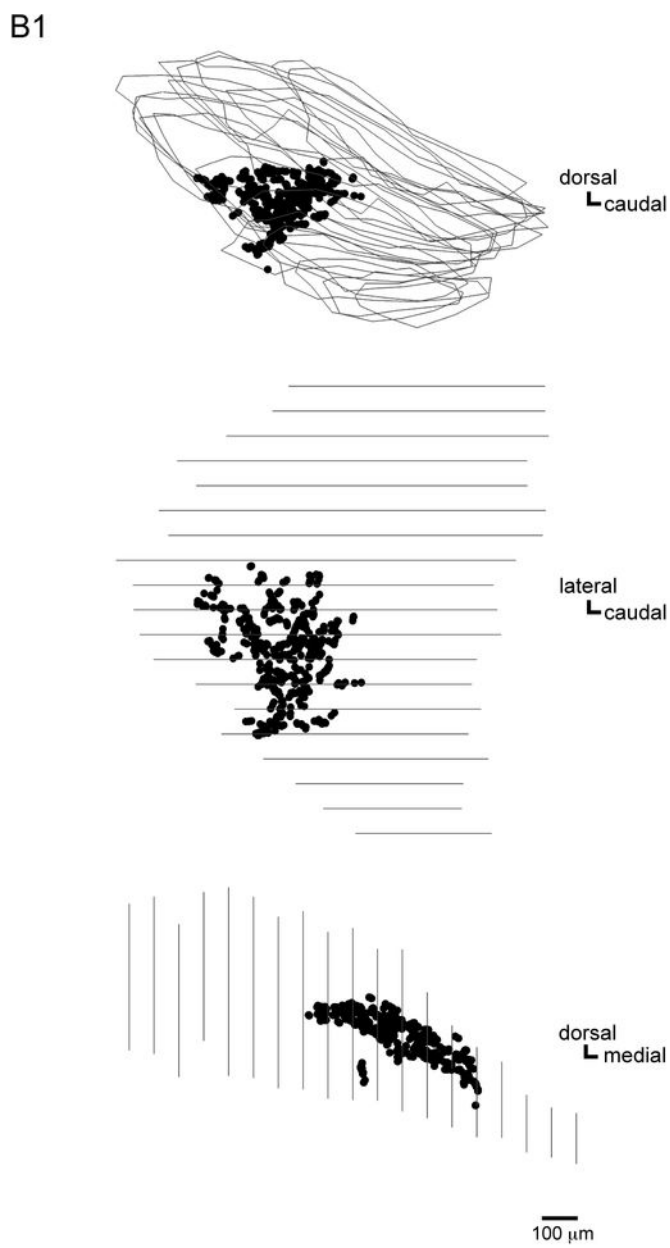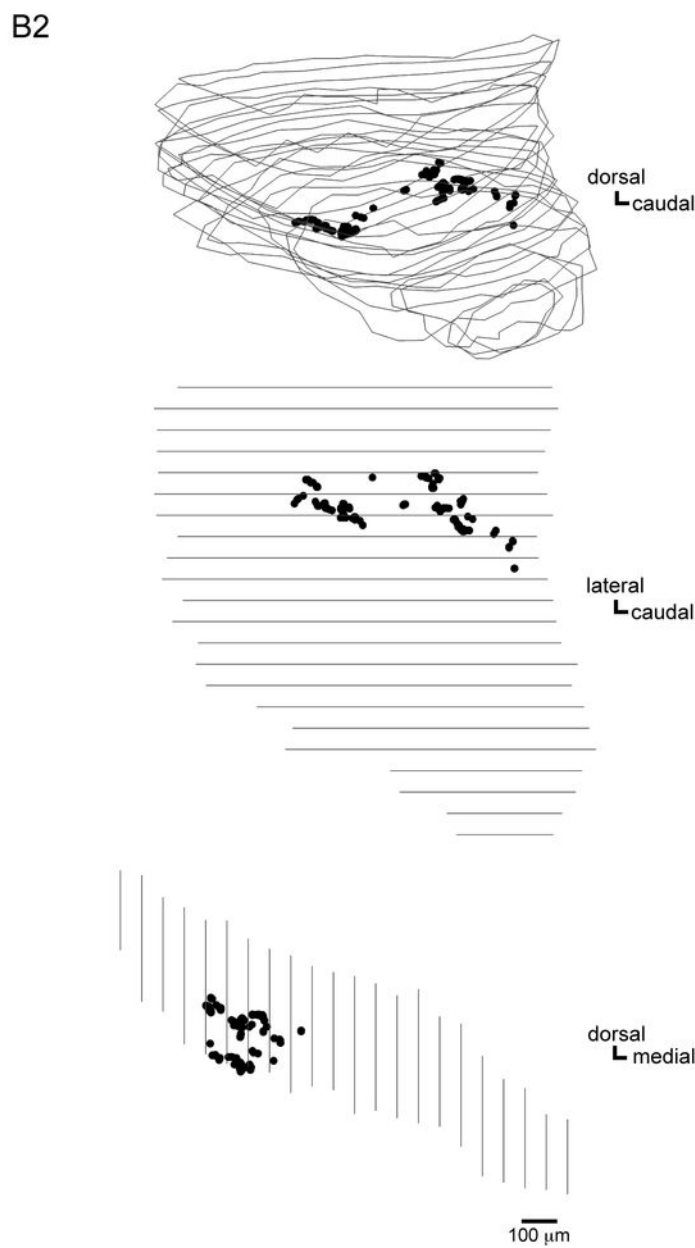

Supplement: 00305.2009_3.pdf [file 00305.2009_3.pdf]
